# Supplementary material for: Assessing Prospects of Integrating Asian Carp Polyculture in Europe: A Nature-Based Solution under Climate Change?
Source: MDPI journal article supplement (doi:10.3390/fishes9040148), 2024-04-22
Supplement: s1 [file s1]

**Table S1.** Bioclimatic variables (35) from the CliMond dataset ([36], (<https://www.climond.org/>))

| Number | Variable                                                   |
|--------|------------------------------------------------------------|
| bio01  | Annual mean temperature (°C)                               |
| bio02  | Mean diurnal temperature range (mean(period max-min)) (°C) |
| bio03  | Isothermality (Bio02 ÷ Bio07)                              |
| bio04  | Temperature seasonality (C of V)                           |
| bio05  | Max temperature of warmest week (°C)                       |
| bio06  | Min temperature of coldest week (°C)                       |
| bio07  | Temperature annual range (Bio05-Bio06) (°C)                |
| bio08  | Mean temperature of wettest quarter (°C)                   |
| bio09  | Mean temperature of driest quarter (°C)                    |
| bio10  | Mean temperature of warmest quarter (°C)                   |
| bio11  | Mean temperature of coldest quarter (°C)                   |
| bio12  | Annual precipitation (mm)                                  |
| bio13  | Precipitation of wettest week (mm)                         |
| bio14  | Precipitation of driest week (mm)                          |
| bio15  | Precipitation seasonality (C of V)                         |
| bio16  | Precipitation of wettest quarter (mm)                      |
| bio17  | Precipitation of driest quarter (mm)                       |
| bio18  | Precipitation of warmest quarter (mm)                      |
| bio19  | Precipitation of coldest quarter (mm)                      |
| bio20  | Annual mean radiation (W m <sup>-2</sup> )                 |
| bio21  | Highest weekly radiation (W m <sup>-2</sup> )              |
| bio22  | Lowest weekly radiation (W m <sup>-2</sup> )               |
| bio23  | Radiation seasonality (C of V)                             |
| bio24  | Radiation of wettest quarter (W m <sup>-2</sup> )          |
| bio25  | Radiation of driest quarter (W m <sup>-2</sup> )           |
| bio26  | Radiation of warmest quarter (W m <sup>-2</sup> )          |
| bio27  | Radiation of coldest quarter (W m <sup>-2</sup> )          |
| bio28  | Annual mean moisture index                                 |
| bio29  | Highest weekly moisture index                              |
| bio30  | Lowest weekly moisture index                               |
| bio31  | Moisture index seasonality (C of V)                        |
| bio32  | Mean moisture index of wettest quarter                     |
| bio33  | Mean moisture index of driest quarter                      |
| bio34  | Mean moisture index of warmest quarter                     |
| bio35  | Mean moisture index of coldest quarter                     |

**Table S2.** Environmental variables (13) from the near-global environmental information for freshwater ecosystems (EarthEnv NGEI, 12 variables characterizing land cover, [37], <http://www.earthenv.org/>) and the Global Aridity Index\_ET0 (Global-AI\_ET0, [38]).

| Number            | Variable                                      |
|-------------------|-----------------------------------------------|
| 1. lc_avg_01      | Evergreen/deciduous needleleaf trees          |
| 2. lc_avg_02      | Evergreen broadleaf trees                     |
| 3. lc_avg_03      | Deciduous broadleaf trees                     |
| 4. lc_avg_04      | Mixed/other trees                             |
| 5. lc_avg_05      | Shrubs                                        |
| 6. lc_avg_06      | Herbaceous vegetation                         |
| 7. lc_avg_07      | Cultivated and managed vegetation             |
| 8. lc_avg_08      | Regularly flooded shrub/herbaceous vegetation |
| 9. lc_avg_09      | Urban/built-up                                |
| 10. lc_avg_10     | Snow/ice                                      |
| 11. lc_avg_11     | Barren lands/sparse vegetation                |
| 12. lc_avg_12     | Open water                                    |
| 13. Global-AI_ET0 | Global Aridity Index                          |
